# Supplementary material for: Unprecedented self-assembly of M3L2 trinuclear lanthanide complexes assisted by a flexible tripodal ligand containing terpyridine binding units
Source: Royal Society of Chemistry journal article supplement (doi:10.1039/b004152l), 2000-01-01
Supplement: b004152l.doc [file b004152l.doc]

***Experimental* :**

The ligand trenterpy was prepared from 2,2’:6’,2’’-terpyridine-6-carboxylic acid chloride and tris(2-aminoethyl)amine (tren) (ratio 3:0.8) in dichloromethane, in presence of triethylamine and was isolated after crystallisation from ethanol as a white powder, in 82% yield. 2,2’:6’,2’’-terpyridine-6-carboxylic acid chloride was obtained by oxidation of 6-methyl-2,2’:6’,2’’-terpyridine with selenium dioxide to give 2,2’:6’,2’’-terpyridine-6-carboxylic acid in 77 % yield followed by reaction with thionyl chloride.

1H NMR (DMSO-d6):  (ppm) 2.95 (bt, 6H, Ha, Ha'), 3.62 (bq, 6H, Hb, Hb'), 7.45 (dd, 3H, H5), 7,91-7.99 (m, 12H, H4"+?), 8.33 (d, 3H), 8.50 (d, 3H), 8.57 (d, 3H), 8.61 (d, 3H), 8.67 (d, 3H), 8.97 (bt, 3H, NH). ""

13C NMR (DMSO-d6):  (ppm) 167 (>C=O), 158.4, 158.0, 157.2, 157.0, 152.8, 152.7, 142.0, 141.6, 140.7, 127.7, 126.2, 125.2, 124.6, 124.3, 124.1, 56.5 and 40.8 (-CHaa'-CHbb'-).

Synthesis of complex **1**

To a suspension of the ligand trenterpy(50 mg, 0.054 mmol) in acetonitrile (3 mL) was added lanthanum trifluoromethenesulfonate La(OTf)3 (47.6 mg, 0.08 mmol, 1.5 eq). The mixture, which became immediately clear, was stirred over night at room temperature. Diethyl ether was diffused into the solution, yielding 98 mg (60%) of yellow crystals. Single crystals suitable for X-ray diffraction analysis were obtained by slow diffusion of diethyl ether in an acetonitrile solution of La(Otf)3 and trenterpy in ratio 3:2. Anal. Calcd. for La3L2(CF3SO3)9.9H2O (C117H108F27La3N26O42S9): La, 11.1 %; C, 37.3 %; H, 2.9 %; N, 9.7 %. Found: La, 10.07 %; C, 36.92 %; H, 2.70 %; N, 9.39 %.

DETAILS OF STRUCTURE DETERMINATION

To prevent loss of solvent, the crystals were coated with a light hydrocarbon oil and quickly transferred to a stream of cold nitrogen on the diffractometer. Nevertheless loss of solvent occurs in some extent resulting in weak diffraction of the fragile crystals. The three uncoordinated triflates were treated as rigid groups. The Uiso for C(64) was fixed at 1.8 and was not refined. The atoms O(42), S(5), F(52), C(65) were refined isotropically. The La, the trenterpy atoms, all the atoms of the coordinated triflates and the remaining atoms of the uncoordinated triflates were refined anisotropically. The mean shift/error on the last cycle was 0.028 and the maximum was 0.934.

Data were collected using a Bruker SMART CCD area detector three-circle diffractometer (Mo K radiation ,  = 0.71073 Å, graphite monochromator).
